# Supplementary material for: Synthesis and characterization of multipod frameworks of Cu2O microcrystals and Cu7S4 hollow microcages
Source: Royal Society of Chemistry journal article supplement (doi:10.1039/c5ce00286a), 2015-01-01
Supplement: c5ce00286a1.pdf [file c5ce00286a1.pdf]

## Supplementary Material (ESI)

---

# Synthesis and Characterization of Multipod Frameworks of Cu<sub>2</sub>O Microcrystals and Cu<sub>7</sub>S<sub>4</sub> Hollow Microcages

Hongdan Zhang,<sup>a</sup> Ziqing Zhang,<sup>a</sup> Benxian Li,<sup>b</sup> Yingjie Hua<sup>c</sup> Chongtai Wang,<sup>c</sup> Xudong Zhao<sup>a\*</sup> and Xiaoyang Liu<sup>a\*</sup>

## Experimental Section

All reagents and solvents were purchased from commercial sources and used as received without further purification. Chemicals used in this study included Cu (Ac)<sub>2</sub> · 2H<sub>2</sub>O (99.5%, Guangdong Xilong Co., China), EDTANa<sub>2</sub> · 2H<sub>2</sub>O (99.0%, Nanjing Chemical Company, China), NaOH (96%, Beijing Co., China), Na<sub>2</sub>S · 2H<sub>2</sub>O (99.5%, Guangdong Xilong Co., China), n-butyl alcohol (99.5%, Nanjing Chemical Company, China) and ethanol (AR, Beijing Fine Chemical Company, China).

## Synthesis of Cu<sub>2</sub>O templates

Three types of Cu<sub>2</sub>O microcrystals were prepared and the reaction conditions are listed in Table 1. In a typical synthesis, 0.744 g EDTANa<sub>2</sub> · 2H<sub>2</sub>O and 0.32 g NaOH were dissolved in 3.5 mL water, and 0.11 g Cu (Ac)<sub>2</sub> · 2H<sub>2</sub>O and 6.5 mL n-butyl alcohol were added into the above solution. The volumes of water and n-butyl alcohol were varied to produce different microcrystals. After sonication in water for 30 s, the solution was transferred into a Teflon-lined stainless steel autoclave. The autoclave was heated to 100°C for 5h, and then allowed to cool down to room temperature. The red products were collected and washed three times with distilled water and absolute ethanol, respectively.

## Synthesis of Cu<sub>2</sub>O–Cu<sub>7</sub>S<sub>4</sub> core–shell particles

In a typical synthesis, the obtained Cu<sub>2</sub>O templates were dispersed in an anhydrous ethanol solution (50 mL), followed by the addition of 50 mL aqueous solution composed of 0.01 M Na<sub>2</sub>S and 0.001 M NaOH at 0 °C in an air atmosphere under magnetic stirring for 45 min. The precipitates were separated by centrifugation, and washed with deionized water and ethanol.

## Synthesis of Cu<sub>7</sub>S<sub>4</sub> hollow particles

In a typical synthesis, the above Cu<sub>2</sub>O–Cu<sub>7</sub>S<sub>4</sub> core–shell particles were immersed in an ammonia solution (25%)

## Supplementary Material (ESI)

for 48 h to remove the inner  $\text{Cu}_2\text{O}$  cores. The particles were centrifuged twice in deionized water and anhydrous ethanol, respectively. They were finally dried at 60 °C for 12 hours in a vacuum oven.

The phases of samples were characterized by X-ray diffraction (XRD, Cu  $\text{K}\alpha 1$  radiation, Rigaku D/max2550VB, Japan). The morphologies and structures of samples were studied using scanning electron microscopy (SEM, JSM-6700F, JEOL, Japan) and transmission electron microscopy (TEM, JSM-3010, JEOL, Japan), respectively.

| No. | N-butyl alcohol | Water |
|-----|-----------------|-------|
|     | (ml)            | (ml)  |
| a   | 6.5             | 3.5   |
| b   | 4.7             | 5.3   |
| c   | 3.2             | 6.8   |

**Table 1.** The volume ratios of n-butyl alcohol to water in the synthesis of sample a-c.

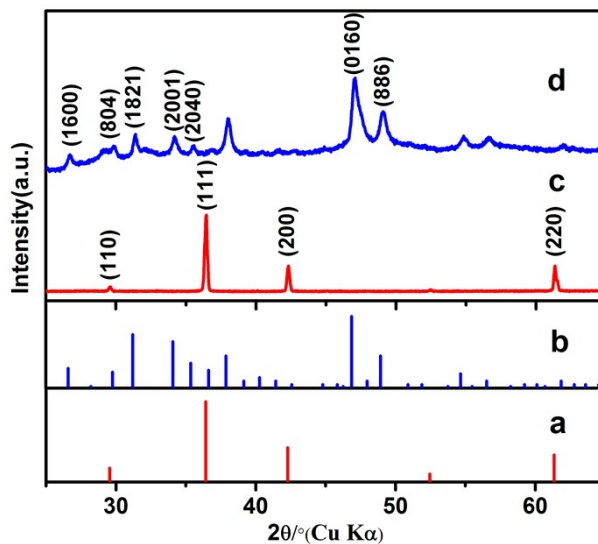

**Figure S1.** XRD patterns: a)  $\text{Cu}_2\text{O}$  with PDF file No. 05-0667, b)  $\text{Cu}_7\text{S}_4$  with PDF file No. 23-0598. Patterns c,d) are the corresponding XRD patterns of 14-pods  $\text{Cu}_2\text{O}$  and  $\text{Cu}_7\text{S}_4$  hollow cages, respectively.

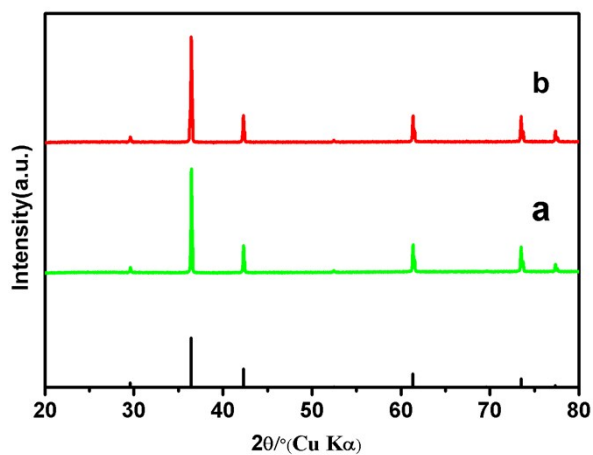

**Figure S2.** XRD patterns: a) 6-pods  $\text{Cu}_2\text{O}$  and b) type I 14-pods  $\text{Cu}_2\text{O}$  with PDF file No. 05-0667

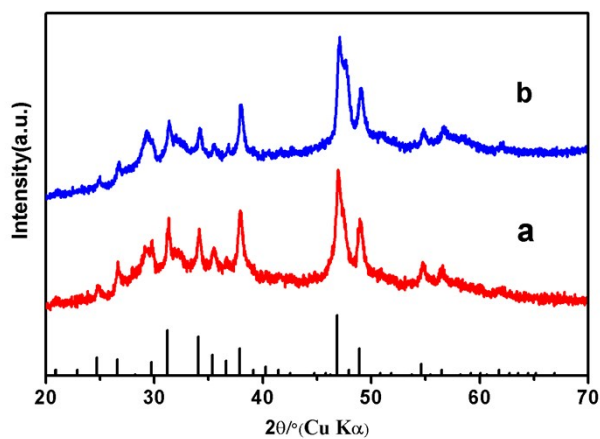

**Figure S3.** XRD patterns: a) 6-pods  $\text{Cu}_7\text{S}_4$  cages and b) type I 14-pods  $\text{Cu}_7\text{S}_4$  cages with PDF file No. 23-0598

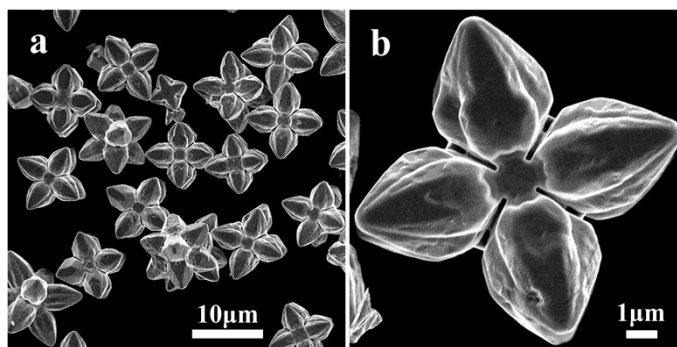

**Figure S4.** SEM images of 8-pods  $\text{Cu}_2\text{O}$ , (a) is the low magnification image, (b) is the high magnification image.
